# Supplementary material for: Three exceptionally strong East-Asian summer monsoon events during glacial times in the past 470 kyr
Source: Copernicus journal article supplement (doi:10.5194/cp-5-157-2009), 2009-04-23
Supplement: Supplementary file 1 [file cp-5-157-2009-supplement.pdf]

Luochuan sequence data. Mollusk groups counts for the interval S0-L5, and associated measured low field susceptibility.

The xerophilous (taxa living in dry places, exposed to the sun) species consist of *Vallonia tenera*, *Pupilla aeoli*, *Cathaica richtofeni*, *C. pulveratrix*, and *C. pulveraticula*.

The hygrophilous (warmth and moisture loving taxa) set includes *Macrochlamys angigyra*, *Opeas striatissimum*, *Vitrea pygmaea*, *Gastrocopta armigerella*, *Punctum orphanum*, *Metodontia yantaiensis*, *M. huaiensis*, *M. beresowski*, *Kaliella lamprocystis* and *Succinea* sp.

A third group can be extracted from the previous one as it gathers the species belonging to *Macrochlamys*, *Opeas*, *Vitrea*, *Gastrocopta* and *Punctum*, and which live in particularly warm and wet habitats, currently distributed in southeastern China (Chen and Gao, 1987; Yen, 1939). Their fossil occurrence in the studied section is an indicator of humid conditions associated with particularly strong summer monsoons.

\*\*\*\*\*

| Total depth(m) | MS (SI) | Age (kyrs) | Total count(ind/15kgs) | G dry(WMI) | G moist G oriental(SMI) |
|----------------|---------|------------|------------------------|------------|-------------------------|
| -0.80          | 152.300 | 6.100      | 126.00                 | 15         | 107                     |
| -0.70          | 98.200  | 9.500      | 133.00                 | 16         | 116                     |
| -0.60          | 96.900  | 10.027     | 172.00                 | 20         | 152                     |
| -0.50          | 97.000  | 10.553     | 80.000                 | 8          | 65                      |
| -0.40          | 92.200  | 11.080     | 28.000                 | 0          | 25                      |
| -0.30          | 89.700  | 11.607     | 38.000                 | 2          | 36                      |
| -0.20          | 87.400  | 12.133     | 63.000                 | 5          | 34                      |
| -0.10          | 72.400  | 12.660     | 55.000                 | 2          | 29                      |
| 0.10           | 59.200  | 13.713     | 65.000                 | 5          | 49                      |
| 0.20           | 41.100  | 14.240     | 26.000                 | 3          | 17                      |
| 0.30           | 41.800  | 14.730     | 47.000                 | 3          | 32                      |
| 0.40           | 34.800  | 15.220     | 15.000                 | 1          | 14                      |
| 0.50           | 37.100  | 15.710     | 13.000                 | 3          | 6                       |
| 0.60           | 30.700  | 16.200     | 14.000                 | 3          | 11                      |
| 0.70           | 32.800  | 16.690     | 23.000                 | 3          | 8                       |
| 0.80           | 32.400  | 17.180     | 11.000                 | 3          | 6                       |
| 0.90           | 34.100  | 17.670     | 12.000                 | 4          | 6                       |
| 1.00           | 32.500  | 18.160     | 3.0000                 | 2          | 3                       |
| 1.10           | 34.000  | 18.650     | 12.000                 | 4          | 9                       |
| 1.20           | 33.400  | 19.460     | 13.000                 | 6          | 12                      |
| 1.30           | 34.500  | 20.270     | 21.000                 | 12         | 9                       |
| 1.40           | 39.100  | 21.080     | 16.000                 | 8          | 8                       |
| 1.50           | 42.700  | 21.890     | 21.000                 | 13         | 8                       |
| 1.60           | 39.700  | 22.700     | 35.000                 | 21         | 12                      |
| 1.70           | 47.600  | 23.510     | 28.000                 | 13         | 19                      |
| 1.80           | 49.000  | 24.320     | 43.000                 | 19         | 28                      |
| 1.90           | 51.200  | 25.130     | 45.000                 | 28         | 28                      |
| 2.00           | 52.700  | 25.940     | 47.000                 | 29         | 26                      |
| 2.10           | 52.200  | 26.750     | 95.000                 | 58         | 21                      |
| 2.20           | 52.000  | 27.560     | 95.000                 | 52         | 34                      |
| 2.30           | 52.100  | 28.370     | 74.000                 | 44         | 25                      |

|      |        |        |        |     |    |    |
|------|--------|--------|--------|-----|----|----|
| 2.40 | 53.200 | 29.180 | 66.000 | 41  | 14 | 0  |
| 2.50 | 60.700 | 29.990 | 56.000 | 25  | 39 | 0  |
| 2.60 | 65.500 | 30.800 | 63.000 | 31  | 28 | 0  |
| 2.70 | 66.100 | 31.610 | 73.000 | 20  | 45 | 0  |
| 2.80 | 65.900 | 32.420 | 92.000 | 36  | 34 | 0  |
| 2.90 | 70.800 | 33.230 | 107.00 | 40  | 31 | 0  |
| 3.00 | 70.500 | 33.804 | 69.000 | 23  | 20 | 0  |
| 3.10 | 69.000 | 34.379 | 82.000 | 54  | 27 | 0  |
| 3.20 | 70.800 | 34.953 | 84.000 | 37  | 31 | 0  |
| 3.30 | 66.900 | 35.528 | 85.000 | 47  | 32 | 0  |
| 3.40 | 67.900 | 36.102 | 124.00 | 66  | 50 | 1  |
| 3.50 | 68.200 | 36.676 | 139.00 | 84  | 28 | 0  |
| 3.60 | 73.700 | 37.251 | 87.000 | 55  | 24 | 0  |
| 3.70 | 69.900 | 37.825 | 133.00 | 85  | 15 | 0  |
| 3.80 | 70.900 | 38.399 | 136.00 | 82  | 21 | 1  |
| 3.90 | 68.400 | 38.974 | 124.00 | 72  | 25 | 1  |
| 4.00 | 67.600 | 39.548 | 117.00 | 66  | 9  | 1  |
| 4.10 | 67.700 | 40.123 | 135.00 | 85  | 11 | 1  |
| 4.20 | 66.500 | 40.697 | 88.000 | 57  | 8  | 0  |
| 4.30 | 67.200 | 41.271 | 113.00 | 63  | 20 | 1  |
| 4.40 | 68.800 | 41.846 | 123.00 | 71  | 16 | 0  |
| 4.50 | 60.000 | 42.420 | 125.00 | 72  | 14 | 0  |
| 4.60 | 62.700 | 43.737 | 134.00 | 75  | 22 | 0  |
| 4.70 | 72.900 | 45.054 | 154.00 | 94  | 33 | 1  |
| 4.80 | 69.600 | 46.371 | 211.00 | 124 | 40 | 0  |
| 4.90 | 72.400 | 47.688 | 164.00 | 108 | 35 | 0  |
| 5.00 | 69.000 | 49.005 | 165.00 | 99  | 24 | 1  |
| 5.10 | 75.400 | 50.322 | 149.00 | 88  | 33 | 0  |
| 5.20 | 80.100 | 51.639 | 180.00 | 100 | 32 | 2  |
| 5.30 | 75.700 | 52.956 | 170.00 | 107 | 32 | 0  |
| 5.40 | 83.100 | 54.273 | 138.00 | 86  | 34 | 1  |
| 5.50 | 88.100 | 55.590 | 149.00 | 78  | 34 | 5  |
| 5.60 | 81.300 | 56.594 | 126.00 | 66  | 23 | 5  |
| 5.70 | 78.700 | 57.597 | 99.000 | 77  | 26 | 6  |
| 5.80 | 69.900 | 58.601 | 145.00 | 82  | 25 | 8  |
| 5.90 | 64.100 | 59.604 | 165.00 | 101 | 26 | 12 |
| 6.00 | 65.600 | 60.608 | 212.00 | 129 | 34 | 12 |
| 6.10 | 65.500 | 61.611 | 233.00 | 163 | 23 | 15 |
| 6.20 | 66.200 | 62.615 | 140.00 | 90  | 28 | 14 |
| 6.30 | 62.800 | 63.619 | 194.00 | 112 | 28 | 15 |
| 6.40 | 53.800 | 64.622 | 183.00 | 128 | 19 | 7  |
| 6.50 | 55.400 | 65.626 | 223.00 | 187 | 10 | 1  |
| 6.60 | 55.800 | 66.629 | 331.00 | 264 | 20 | 4  |
| 6.70 | 49.100 | 67.633 | 321.00 | 252 | 34 | 6  |
| 6.80 | 33.300 | 68.636 | 363.00 | 307 | 14 | 0  |
| 6.90 | 33.800 | 69.640 | 488.00 | 465 | 17 | 3  |
| 7.00 | 33.900 | 70.523 | 265.00 | 251 | 9  | 0  |
| 7.10 | 34.800 | 71.407 | 189.00 | 181 | 4  | 0  |
| 7.20 | 31.600 | 72.290 | 228.00 | 220 | 8  | 0  |
| 7.30 | 31.400 | 72.930 | 134.00 | 128 | 4  | 0  |
| 7.40 | 34.600 | 73.570 | 99.000 | 89  | 8  | 1  |

|       |         |         |        |     |    |    |  |  |
|-------|---------|---------|--------|-----|----|----|--|--|
| 7.50  | 37.200  | 74.210  | 437.00 | 421 | 13 | 0  |  |  |
| 7.60  | 34.400  | 74.850  | 357.00 | 348 | 11 | 1  |  |  |
| 7.70  | 36.000  | 75.490  | 457.00 | 445 | 12 | 1  |  |  |
| 7.80  | 37.800  | 76.130  | 352.00 | 342 | 13 | 0  |  |  |
| 7.90  | 38.400  | 76.770  | 495.00 | 486 | 9  | 0  |  |  |
| 8.00  | 37.300  | 77.410  | 263.00 | 247 | 15 | 0  |  |  |
| 8.10  | 37.500  | 78.050  | 321.00 | 309 | 14 | 2  |  |  |
| 8.20  | 43.500  | 78.690  | 224.00 | 211 | 16 | 0  |  |  |
| 8.30  | 41.400  | 79.330  | 254.00 | 215 | 39 | 0  |  |  |
| 8.40  | 48.200  | 79.704  | 264.00 | 234 | 31 | 0  |  |  |
| 8.50  | 50.800  | 80.078  | 236.00 | 217 | 27 | 0  |  |  |
| 8.60  | 71.300  | 80.452  | 96.000 | 81  | 15 | 1  |  |  |
| 8.70  | 73.700  | 80.826  | 94.000 | 73  | 20 | 5  |  |  |
| 8.80  | 129.300 | 81.200  | 70.000 | 38  | 17 | 8  |  |  |
| 8.90  | 104.500 | 83.633  | 72.000 | 23  | 19 | 13 |  |  |
| 9.00  | 111.400 | 86.066  | 107.00 | 26  | 39 | 27 |  |  |
| 9.10  | 128.300 | 88.499  | 161.00 | 42  | 50 | 35 |  |  |
| 9.20  | 114.400 | 90.932  | 128.00 | 45  | 42 | 23 |  |  |
| 9.30  | 105.800 | 93.365  | 115.00 | 56  | 32 | 25 |  |  |
| 9.40  | 131.600 | 95.798  | 87.000 | 58  | 21 | 7  |  |  |
| 9.50  | 132.800 | 98.231  | 146.00 | 95  | 24 | 7  |  |  |
| 9.60  | 161.400 | 100.664 | 59.000 | 40  | 8  | 2  |  |  |
| 9.70  | 170.800 | 103.097 | 48.000 | 29  | 6  | 2  |  |  |
| 9.80  | 168.000 | 105.530 | 16.000 | 9   | 4  | 0  |  |  |
| 9.90  | 180.300 | 112.450 | 1.0000 | 0   | 0  | 0  |  |  |
| 10.00 | 171.200 | 116.600 | 5.0000 | 4   | 1  | 0  |  |  |
| 10.10 | 165.600 | 120.750 | 5.0000 | 4   | 0  | 0  |  |  |
| 10.20 | 154.200 | 123.192 | 1.0000 | 0   | 0  | 0  |  |  |
| 10.30 | 122.700 | 125.634 | 1.0000 | 0   | 1  | 1  |  |  |
| 10.40 | 97.500  | 128.076 | 1.0000 | 0   | 0  | 0  |  |  |
| 10.50 | 74.900  | 130.518 | 2.0000 | 0   | 0  | 0  |  |  |
| 10.60 | 23.300  | 132.960 | 69.000 | 66  | 3  | 0  |  |  |
| 10.70 | 25.200  | 133.538 | 91.000 | 91  | 0  | 0  |  |  |
| 10.80 | 24.400  | 134.117 | 201.00 | 199 | 2  | 1  |  |  |
| 10.90 | 21.500  | 134.695 | 210.00 | 210 | 2  | 0  |  |  |
| 11.00 | 24.400  | 135.274 | 326.00 | 322 | 4  | 2  |  |  |
| 11.10 | 24.700  | 135.852 | 434.00 | 431 | 3  | 3  |  |  |
| 11.20 | 25.100  | 136.431 | 493.00 | 485 | 8  | 4  |  |  |
| 11.30 | 27.100  | 137.009 | 541.00 | 537 | 5  | 3  |  |  |
| 11.40 | 29.200  | 137.588 | 513.00 | 509 | 5  | 2  |  |  |
| 11.50 | 31.800  | 138.166 | 479.00 | 472 | 7  | 6  |  |  |
| 11.60 | 32.100  | 138.745 | 596.00 | 586 | 11 | 7  |  |  |
| 11.70 | 33.000  | 139.323 | 559.00 | 546 | 14 | 8  |  |  |
| 11.80 | 33.800  | 139.902 | 586.00 | 573 | 13 | 6  |  |  |
| 11.90 | 33.800  | 140.480 | 617.00 | 598 | 19 | 11 |  |  |
| 12.00 | 36.100  | 141.058 | 566.00 | 559 | 6  | 3  |  |  |
| 12.10 | 34.700  | 141.637 | 431.00 | 419 | 11 | 5  |  |  |
| 12.20 | 34.700  | 142.215 | 439.00 | 423 | 16 | 5  |  |  |
| 12.30 | 36.100  | 142.794 | 394.00 | 380 | 16 | 2  |  |  |
| 12.40 | 33.700  | 143.372 | 376.00 | 361 | 13 | 7  |  |  |
| 12.50 | 30.000  | 143.951 | 346.00 | 332 | 15 | 0  |  |  |

|       |         |         |        |     |     |    |
|-------|---------|---------|--------|-----|-----|----|
| 12.60 | 30.200  | 144.529 | 203.00 | 198 | 5   | 0  |
| 12.70 | 30.700  | 145.108 | 259.00 | 252 | 5   | 1  |
| 12.80 | 27.500  | 145.690 | 230.00 | 220 | 10  | 1  |
| 12.90 | 25.600  | 146.265 | 206.00 | 198 | 6   | 0  |
| 13.00 | 27.000  | 146.843 | 175.00 | 168 | 7   | 0  |
| 13.10 | 24.000  | 147.422 | 113.00 | 108 | 4   | 0  |
| 13.20 | 23.100  | 148.000 | 121.00 | 111 | 9   | 0  |
| 13.30 | 24.500  | 149.013 | 163.00 | 132 | 29  | 8  |
| 13.40 | 30.300  | 150.027 | 187.00 | 153 | 22  | 5  |
| 13.50 | 30.200  | 151.040 | 183.00 | 150 | 27  | 9  |
| 13.60 | 32.500  | 152.053 | 150.00 | 116 | 31  | 7  |
| 13.70 | 41.400  | 153.067 | 169.00 | 120 | 42  | 11 |
| 13.80 | 53.600  | 154.080 | 289.00 | 239 | 39  | 12 |
| 13.90 | 60.500  | 155.093 | 275.00 | 147 | 77  | 28 |
| 14.00 | 71.600  | 156.107 | 252.00 | 138 | 86  | 29 |
| 14.10 | 72.800  | 157.120 | 324.00 | 147 | 139 | 50 |
| 14.20 | 59.100  | 158.582 | 223.00 | 100 | 94  | 31 |
| 14.30 | 68.200  | 160.044 | 351.00 | 179 | 129 | 45 |
| 14.41 | 68.900  | 161.652 | 488.00 | 210 | 232 | 79 |
| 14.50 | 64.700  | 162.968 | 285.00 | 143 | 108 | 40 |
| 14.60 | 51.500  | 164.430 | 379.00 | 196 | 155 | 36 |
| 14.70 | 43.300  | 165.892 | 418.00 | 263 | 133 | 26 |
| 14.80 | 39.100  | 167.354 | 368.00 | 252 | 97  | 14 |
| 14.90 | 35.600  | 168.816 | 392.00 | 269 | 112 | 26 |
| 15.00 | 35.200  | 170.278 | 327.00 | 258 | 71  | 12 |
| 15.10 | 33.700  | 171.740 | 315.00 | 270 | 48  | 8  |
| 15.20 | 38.200  | 172.940 | 402.00 | 366 | 43  | 5  |
| 15.30 | 43.400  | 174.140 | 348.00 | 313 | 43  | 6  |
| 15.40 | 46.200  | 175.340 | 516.00 | 483 | 50  | 0  |
| 15.50 | 52.800  | 176.540 | 549.00 | 526 | 34  | 0  |
| 15.60 | 56.000  | 177.740 | 560.00 | 549 | 21  | 0  |
| 15.70 | 61.400  | 178.940 | 833.00 | 818 | 18  | 2  |
| 15.80 | 74.800  | 180.140 | 81.000 | 74  | 7   | 2  |
| 15.90 | 82.500  | 181.340 | 675.00 | 643 | 30  | 9  |
| 16.00 | 112.400 | 182.540 | 318.00 | 307 | 18  | 2  |
| 16.10 | 141.200 | 183.740 | 87.000 | 83  | 3   | 0  |
| 16.21 | 142.900 | 187.010 | 23.000 | 21  | 2   | 0  |
| 16.30 | 150.700 | 197.300 | 16.000 | 12  | 4   | 2  |
| 16.40 | 148.900 | 203.220 | 12.000 | 9   | 3   | 1  |
| 16.50 | 149.800 | 205.237 | 10.000 | 8   | 2   | 2  |
| 16.60 | 140.800 | 207.253 | 17.000 | 13  | 4   | 2  |
| 16.70 | 133.100 | 209.270 | 79.000 | 47  | 32  | 11 |
| 16.80 | 113.700 | 209.957 | 108.00 | 63  | 45  | 19 |
| 16.90 | 90.400  | 210.643 | 114.00 | 63  | 51  | 17 |
| 17.00 | 65.300  | 211.330 | 84.000 | 60  | 21  | 8  |
| 17.10 | 62.800  | 212.471 | 70.000 | 53  | 17  | 7  |
| 17.20 | 51.200  | 213.612 | 254.00 | 190 | 49  | 14 |
| 17.30 | 45.600  | 214.753 | 75.000 | 67  | 8   | 3  |
| 17.40 | 42.800  | 215.894 | 101.00 | 78  | 23  | 5  |
| 17.50 | 39.700  | 217.035 | 95.000 | 81  | 14  | 4  |
| 17.61 | 38.700  | 218.290 | 55.000 | 49  | 6   | 4  |

|       |         |         |         |     |     |    |
|-------|---------|---------|---------|-----|-----|----|
| 17.70 | 103.200 | 224.040 | 76.000  | 50  | 24  | 10 |
| 17.80 | 105.400 | 228.670 | 81.000  | 61  | 20  | 8  |
| 17.90 | 95.100  | 229.751 | 78.000  | 54  | 24  | 12 |
| 18.00 | 92.700  | 230.831 | 143.000 | 100 | 40  | 19 |
| 18.10 | 80.800  | 231.912 | 145.000 | 80  | 60  | 34 |
| 18.20 | 74.300  | 232.993 | 179.000 | 114 | 63  | 15 |
| 18.30 | 66.900  | 234.074 | 219.000 | 153 | 54  | 17 |
| 18.40 | 67.300  | 235.154 | 193.000 | 126 | 63  | 24 |
| 18.50 | 57.400  | 236.235 | 175.000 | 125 | 45  | 13 |
| 18.60 | 51.900  | 237.316 | 238.000 | 170 | 63  | 20 |
| 18.70 | 51.200  | 238.396 | 292.000 | 237 | 50  | 19 |
| 18.80 | 44.100  | 239.477 | 435.000 | 357 | 64  | 21 |
| 18.90 | 48.500  | 240.558 | 366.000 | 312 | 41  | 17 |
| 19.00 | 47.100  | 241.639 | 433.000 | 401 | 26  | 7  |
| 19.10 | 52.100  | 242.719 | 544.000 | 507 | 31  | 16 |
| 19.20 | 37.400  | 243.800 | 578.000 | 543 | 20  | 6  |
| 19.30 | 34.400  | 244.164 | 552.000 | 512 | 8   | 6  |
| 19.40 | 36.000  | 244.528 | 538.000 | 511 | 11  | 6  |
| 19.50 | 35.400  | 244.892 | 612.000 | 579 | 3   | 0  |
| 19.60 | 37.100  | 245.256 | 569.000 | 532 | 7   | 0  |
| 19.70 | 36.800  | 245.620 | 537.000 | 516 | 3   | 0  |
| 19.80 | 35.900  | 246.907 | 571.000 | 532 | 26  | 5  |
| 19.90 | 43.300  | 248.194 | 573.000 | 541 | 14  | 2  |
| 20.00 | 41.600  | 249.481 | 549.000 | 532 | 13  | 3  |
| 20.10 | 45.300  | 250.768 | 638.000 | 606 | 19  | 4  |
| 20.20 | 46.700  | 252.055 | 599.000 | 573 | 20  | 1  |
| 20.30 | 46.800  | 253.342 | 516.000 | 500 | 22  | 0  |
| 20.40 | 47.000  | 254.629 | 536.000 | 495 | 44  | 2  |
| 20.50 | 48.100  | 255.916 | 393.000 | 348 | 48  | 0  |
| 20.60 | 48.300  | 257.203 | 339.000 | 280 | 61  | 0  |
| 20.70 | 47.900  | 258.490 | 229.000 | 168 | 66  | 1  |
| 20.80 | 54.600  | 261.314 | 227.000 | 165 | 69  | 0  |
| 20.90 | 62.800  | 264.139 | 238.000 | 184 | 58  | 3  |
| 21.00 | 77.800  | 266.963 | 258.000 | 194 | 68  | 2  |
| 21.10 | 86.600  | 269.787 | 242.000 | 163 | 86  | 9  |
| 21.20 | 104.900 | 272.611 | 200.000 | 142 | 64  | 8  |
| 21.30 | 126.700 | 275.436 | 232.000 | 144 | 93  | 12 |
| 21.40 | 149.100 | 278.260 | 152.000 | 75  | 80  | 6  |
| 21.50 | 150.700 | 280.885 | 63.000  | 23  | 40  | 6  |
| 21.60 | 160.900 | 283.510 | 46.000  | 18  | 29  | 5  |
| 21.70 | 149.800 | 286.146 | 57.000  | 19  | 40  | 10 |
| 21.80 | 133.600 | 288.782 | 33.000  | 6   | 27  | 12 |
| 21.90 | 125.200 | 291.418 | 62.000  | 7   | 55  | 23 |
| 22.00 | 123.300 | 294.054 | 99.000  | 16  | 86  | 34 |
| 22.10 | 121.700 | 296.690 | 118.000 | 43  | 76  | 23 |
| 22.20 | 127.000 | 299.324 | 138.000 | 51  | 85  | 21 |
| 22.30 | 122.600 | 301.958 | 130.000 | 27  | 104 | 23 |
| 22.40 | 126.100 | 304.592 | 122.000 | 24  | 99  | 39 |
| 22.50 | 131.000 | 307.226 | 98.000  | 19  | 79  | 30 |
| 22.60 | 139.600 | 309.860 | 37.000  | 10  | 27  | 10 |
| 22.70 | 134.500 | 314.215 | 53.000  | 27  | 25  | 4  |

|       |         |         |        |      |     |     |
|-------|---------|---------|--------|------|-----|-----|
| 22.80 | 118.800 | 318.570 | 63.000 | 19   | 45  | 11  |
| 22.90 | 130.200 | 323.290 | 46.000 | 20   | 27  | 0   |
| 23.00 | 105.600 | 324.099 | 36.000 | 16   | 20  | 1   |
| 23.10 | 99.300  | 324.908 | 51.000 | 33   | 18  | 2   |
| 23.20 | 92.700  | 325.716 | 74.000 | 54   | 19  | 5   |
| 23.30 | 73.900  | 326.525 | 77.000 | 65   | 12  | 3   |
| 23.40 | 71.800  | 327.334 | 110.00 | 101  | 9   | 1   |
| 23.50 | 79.200  | 328.142 | 130.00 | 95   | 35  | 9   |
| 23.60 | 22.400  | 328.951 | 81.000 | 75   | 6   | 4   |
| 23.70 | 17.200  | 329.760 | 148.00 | 117  | 32  | 12  |
| 23.80 | 20.200  | 330.209 | 82.000 | 81   | 1   | 1   |
| 23.90 | 18.800  | 330.658 | 161.00 | 153  | 6   | 4   |
| 24.00 | 19.900  | 331.107 | 73.000 | 61   | 10  | 7   |
| 24.10 | 21.200  | 331.556 | 287.00 | 270  | 16  | 15  |
| 24.20 | 21.700  | 332.005 | 299.00 | 277  | 20  | 18  |
| 24.30 | 22.700  | 332.454 | 380.00 | 358  | 21  | 19  |
| 24.40 | 24.700  | 332.902 | 494.00 | 460  | 30  | 28  |
| 24.50 | 26.000  | 333.351 | 443.00 | 418  | 22  | 18  |
| 24.60 | 27.300  | 333.800 | 1149.0 | 1062 | 82  | 79  |
| 24.80 | 30.700  | 334.698 | 1557.0 | 1417 | 134 | 123 |
| 24.90 | 35.000  | 335.147 | 1250.0 | 1143 | 96  | 83  |
| 25.00 | 33.100  | 335.596 | 1649.0 | 1418 | 227 | 199 |
| 25.10 | 30.900  | 336.045 | 1680.0 | 1410 | 255 | 238 |
| 25.20 | 34.600  | 336.494 | 1678.0 | 1388 | 288 | 272 |
| 25.30 | 31.900  | 336.943 | 1328.0 | 1148 | 180 | 170 |
| 25.40 | 33.800  | 337.392 | 1609.0 | 1324 | 286 | 255 |
| 25.50 | 32.700  | 337.841 | 1460.0 | 1197 | 242 | 222 |
| 25.60 | 33.500  | 338.290 | 1281.0 | 999  | 279 | 249 |
| 25.70 | 33.500  | 338.739 | 1407.0 | 1104 | 280 | 267 |
| 25.80 | 33.000  | 339.188 | 2137.0 | 1506 | 606 | 578 |
| 25.90 | 34.100  | 339.636 | 1768.0 | 1251 | 486 | 469 |
| 26.00 | 30.600  | 340.085 | 1619.0 | 1161 | 418 | 401 |
| 26.10 | 33.100  | 340.534 | 1964.0 | 1353 | 576 | 564 |
| 26.20 | 27.800  | 340.983 | 1386.0 | 1011 | 340 | 331 |
| 26.30 | 32.000  | 341.432 | 1298.0 | 842  | 426 | 420 |
| 26.40 | 31.400  | 341.881 | 1772.0 | 1158 | 572 | 565 |
| 26.50 | 30.500  | 342.330 | 1540.0 | 999  | 489 | 483 |
| 26.60 | 34.700  | 344.360 | 1381.0 | 978  | 342 | 331 |
| 26.70 | 42.500  | 346.390 | 1319.0 | 916  | 303 | 301 |
| 26.80 | 47.400  | 348.421 | 1194.0 | 921  | 192 | 189 |
| 26.90 | 55.900  | 350.451 | 1129.0 | 888  | 142 | 137 |
| 27.00 | 60.400  | 352.481 | 913.00 | 746  | 97  | 95  |
| 27.10 | 65.500  | 354.511 | 737.00 | 581  | 97  | 97  |
| 27.20 | 69.100  | 356.542 | 540.00 | 405  | 98  | 98  |
| 27.30 | 80.500  | 358.572 | 474.00 | 379  | 65  | 61  |
| 27.40 | 89.800  | 360.602 | 510.00 | 406  | 78  | 76  |
| 27.50 | 90.000  | 362.632 | 502.00 | 410  | 79  | 74  |
| 27.60 | 92.900  | 364.663 | 428.00 | 327  | 94  | 90  |
| 27.70 | 109.300 | 366.693 | 424.00 | 330  | 85  | 85  |
| 27.80 | 110.100 | 368.723 | 411.00 | 305  | 91  | 83  |
| 27.90 | 113.800 | 370.753 | 393.00 | 300  | 82  | 80  |

|       |                |             |            |     |    |
|-------|----------------|-------------|------------|-----|----|
| 28.00 | 121.600        | 372.784     | 228.00 173 | 47  | 47 |
| 28.10 | 122.600        | 374.814     | 248.00 173 | 67  | 65 |
| 28.20 | 129.900        | 376.844     | 219.00 148 | 66  | 60 |
| 28.30 | 143.700        | 378.874     | 121.00 73  | 46  | 46 |
| 28.40 | 153.400        | 380.905     | 93.000 63  | 27  | 27 |
| 28.50 | 158.900        | 382.935     | 24.000 15  | 9   | 9  |
| 28.60 | 158.800        | 386.537     | 18.000 14  | 4   | 4  |
| 28.70 | 162.900        | 391.710     | 29.000 19  | 10  | 10 |
| 28.80 | 165.000        | 396.883     | 27.000 19  | 8   | 8  |
| 28.90 | 159.600        | 400.319     | 21.000 12  | 9   | 7  |
| 29.00 | 156.400        | 402.018     | 11.000 7   | 4   | 4  |
| 29.10 | 163.400        | 403.717     | 5.0000 4   | 1   | 1  |
| 29.20 | 160.400        | 405.416     | 0.0000 0   | 0   | 0  |
| 29.30 | 139.500        | 407.115     | 0.0000 0   | 0   | 0  |
| 29.40 | 129.100        | 408.814     | 0.0000 0   | 0   | 0  |
| 29.50 | 111.800        | 410.513     | 2.0000 1   | 1   | 1  |
| 29.60 | 100.600        | 412.212     | 7.0000 4   | 3   | 3  |
| 29.70 | 87.700 413.911 | 7.0000 2    | 5          | 5   |    |
| 29.80 | 82.100 419.455 | 7.0000 3    | 4          | 4   |    |
| 29.90 | 64.400 424.419 | 0.0000 0    | 0          | 0   |    |
| 30.00 | 33.200 424.957 | 26.000 23   | 4          | 2   |    |
| 30.10 | 26.200 425.495 | 73.000 68   | 8          | 3   |    |
| 30.20 | 22.000 426.034 | 59.000 52   | 9          | 2   |    |
| 30.30 | 20.700 426.572 | 181.00 168  | 19         | 3   |    |
| 30.40 | 20.100 427.110 | 211.00 194  | 27         | 8   |    |
| 30.50 | 21.600 427.853 | 336.00 320  | 22         | 8   |    |
| 30.60 | 25.900 428.596 | 437.00 403  | 42         | 11  |    |
| 30.70 | 28.800 429.339 | 513.00 469  | 44         | 15  |    |
| 30.80 | 29.900 430.082 | 618.00 583  | 40         | 28  |    |
| 30.90 | 30.300 430.825 | 818.00 737  | 94         | 45  |    |
| 31.00 | 32.500 431.568 | 870.00 803  | 86         | 49  |    |
| 31.10 | 33.800 432.311 | 1137.0 1023 | 130        | 92  |    |
| 31.20 | 34.900 433.054 | 1101.0 983  | 136        | 98  |    |
| 31.30 | 38.600 433.797 | 925.00 787  | 158        | 119 |    |
| 31.40 | 38.000 434.540 | 1090.0 927  | 177        | 147 |    |
| 31.50 | 33.800 435.203 | 1086.0 927  | 178        | 138 |    |
| 31.60 | 31.200 435.865 | 1001.0 794  | 224        | 173 |    |
| 31.70 | 29.200 436.528 | 760.00 608  | 168        | 128 |    |
| 31.80 | 27.900 437.190 | 927.00 801  | 139        | 98  |    |
| 31.90 | 30.500 437.853 | 966.00 838  | 145        | 109 |    |
| 32.00 | 27.300 438.515 | 756.00 675  | 101        | 70  |    |
| 32.10 | 24.700 439.178 | 1943.0 1421 | 539        | 481 |    |
| 32.20 | 33.000 439.840 | 1099.0 923  | 185        | 147 |    |
| 32.30 | 31.400 440.502 | 1182.0 984  | 223        | 151 |    |
| 32.40 | 28.000 441.165 | 1175.0 1001 | 195        | 141 |    |
| 32.50 | 32.400 441.828 | 1474.0 1211 | 282        | 226 |    |
| 32.60 | 32.000 442.490 | 1737.0 1429 | 325        | 276 |    |
| 32.70 | 37.100 443.153 | 2257.0 1828 | 447        | 394 |    |
| 32.80 | 37.000 443.815 | 1325.0 1044 | 290        | 248 |    |
| 32.90 | 37.000 444.478 | 2216.0 1718 | 519        | 457 |    |
| 33.00 | 38.900 445.140 | 1846.0 1449 | 416        | 354 |    |

|       |         |         |        |      |     |     |
|-------|---------|---------|--------|------|-----|-----|
| 33.10 | 40.700  | 445.803 | 2126.0 | 1667 | 475 | 412 |
| 33.20 | 38.500  | 446.465 | 1259.0 | 950  | 317 | 285 |
| 33.30 | 41.000  | 447.127 | 1654.0 | 1258 | 405 | 370 |
| 33.40 | 50.700  | 447.790 | 1346.0 | 1011 | 344 | 309 |
| 33.50 | 49.000  | 449.026 | 634.00 | 541  | 103 | 73  |
| 33.60 | 49.600  | 450.261 | 1740.0 | 1368 | 395 | 340 |
| 33.70 | 48.100  | 451.497 | 1480.0 | 1140 | 352 | 314 |
| 33.80 | 52.400  | 452.732 | 1439.0 | 1144 | 308 | 270 |
| 33.90 | 43.400  | 453.968 | 1151.0 | 959  | 208 | 167 |
| 34.00 | 47.500  | 455.203 | 1057.0 | 903  | 172 | 128 |
| 34.10 | 56.300  | 456.439 | 1047.0 | 884  | 177 | 122 |
| 34.20 | 54.700  | 457.674 | 884.00 | 751  | 146 | 91  |
| 34.30 | 51.000  | 458.910 | 444.00 | 393  | 60  | 26  |
| 34.40 | 53.500  | 461.464 | 452.00 | 425  | 37  | 12  |
| 34.50 | 63.700  | 464.018 | 516.00 | 487  | 38  | 19  |
| 34.60 | 76.800  | 466.572 | 415.00 | 371  | 47  | 19  |
| 34.70 | 107.300 | 469.126 | 442.00 | 416  | 31  | 17  |
| 34.80 | 175.100 | 471.680 | 193.00 | 189  | 6   | 2   |
